# Supplementary material for: Atrial Fibrillation Global Changes after Pulmonary Vein and Posterior Wall Isolation: A Charge Density Mapping Study
Source: MDPI journal article supplement (doi:10.3390/jcm11102948), 2022-05-23
Supplement: s1 [file s1]

## SUPPLEMENTARY TABLES

### Supplementary Table S1.

Charge density map data by region and procedural step

| Procedural step |                                     | Anterior<br>(N=33) | Septal<br>(N=33) | Lateral<br>(N=33) | Roof<br>(N=33) | Posterior<br>(N=33) | Inferior<br>(N=33) | Total<br>(N=198) | p<br>value |
|-----------------|-------------------------------------|--------------------|------------------|-------------------|----------------|---------------------|--------------------|------------------|------------|
| Baseline        | Global AFCL mean (ms)               | 184.4 ±            | 184.4 ±          | 184.4 ±           | 184.4 ±        | 184.4 ±             | 184.4 ±            | 184.4 ±          | 1.00       |
|                 |                                     | 15.0               | 15.0             | 15.0              | 15.0           | 15.0                | 15.0               | 14.4             |            |
|                 | Global AFCL SD (ms)                 | 6.5 ± 1.9          | 6.5 ± 1.9        | 6.5 ± 1.9         | 6.5 ± 1.9      | 6.5 ± 1.9           | 6.5 ± 1.9          | 6.5 ± 1.8        | 1.00       |
|                 | Global AFCL CovC                    | 3.6 ± 1.1          | 3.6 ± 1.1        | 3.6 ± 1.1         | 3.6 ± 1.1      | 3.6 ± 1.1           | 3.6 ± 1.1          | 3.6 ± 1.1        | 1.00       |
|                 | Regional AFCL mean (ms)             | 185.4 ±            | 184.9 ±          | 188.1 ±           | 180.1 ±        | 182.1 ±             | 186.4 ±            | 184.5 ±          | 0.84       |
|                 |                                     | 15.5               | 16.9             | 14.6              | 14.8           | 14.5                | 14.6               | 14.8             |            |
|                 | Regional AFCL SD (ms)               | 6.6 ± 2.6          | 4.7 ± 2.2        | 4.7 ± 1.8         | 4.0 ± 1.9      | 5.3 ± 2.5           | 5.4 ± 2.3          | 5.1 ± 2.3        | 0.16       |
|                 | Regional AFCL CovC                  | 3.5 ± 1.3          | 2.5 ± 1.3        | 2.5 ± 1.0         | 2.2 ± 0.9      | 2.9 ± 1.5           | 3.0 ± 1.4          | 2.8 ± 1.3        | 0.20       |
|                 | Global Intra Chamber Coherence mean | 0.4 ± 0.1          | 0.4 ± 0.1        | 0.4 ± 0.1         | 0.4 ± 0.1      | 0.4 ± 0.1           | 0.4 ± 0.1          | 0.4 ± 0.1        | 1.00       |

|                                              |             |             |             |             |             |             |             |         |
|----------------------------------------------|-------------|-------------|-------------|-------------|-------------|-------------|-------------|---------|
| <b>Global Intra Chamber Coherence max</b>    | 0.5 ± 0.1   | 0.5 ± 0.1   | 0.5 ± 0.1   | 0.5 ± 0.1   | 0.5 ± 0.1   | 0.5 ± 0.1   | 0.5 ± 0.1   | 1.00    |
| <b>Global Intra Chamber Coherence SD</b>     | 0.1 ± 0.0   | 0.1 ± 0.0   | 0.1 ± 0.0   | 0.1 ± 0.0   | 0.1 ± 0.0   | 0.1 ± 0.0   | 0.1 ± 0.0   | 1.00    |
| <b>Regional Intra Chamber Coherence mean</b> | 0.3 ± 0.1   | 0.4 ± 0.1   | 0.4 ± 0.1   | 0.4 ± 0.1   | 0.4 ± 0.1   | 0.4 ± 0.1   | 0.4 ± 0.1   | 0.93    |
| <b>Regional Intra Chamber Coherence max</b>  | 0.5 ± 0.1   | 0.5 ± 0.1   | 0.5 ± 0.1   | 0.5 ± 0.1   | 0.5 ± 0.1   | 0.5 ± 0.1   | 0.5 ± 0.1   | 0.99    |
| <b>Regional Intra Chamber Coherence SD</b>   | 0.1 ± 0.0   | 0.1 ± 0.0   | 0.0 ± 0.0   | 0.1 ± 0.0   | 0.1 ± 0.0   | 0.0 ± 0.0   | 0.1 ± 0.0   | 0.56    |
| <b>Global Recurrence Mean</b>                | 0.4 ± 0.1   | 0.4 ± 0.1   | 0.4 ± 0.1   | 0.4 ± 0.1   | 0.4 ± 0.1   | 0.4 ± 0.1   | 0.4 ± 0.1   | 1.00    |
| <b>Global Recurrence SD</b>                  | 0.2 ± 0.0   | 0.2 ± 0.0   | 0.2 ± 0.0   | 0.2 ± 0.0   | 0.2 ± 0.0   | 0.2 ± 0.0   | 0.2 ± 0.0   | 1.00    |
| <b>Regional Recurrence Mean</b>              | 0.5 ± 0.1   | 0.6 ± 0.1   | 0.7 ± 0.1   | 0.6 ± 0.1   | 0.5 ± 0.1   | 0.7 ± 0.1   | 0.6 ± 0.1   | < 0.001 |
| <b>Regional Recurrence SD</b>                | 0.2 ± 0.0   | 0.2 ± 0.0   | 0.2 ± 0.0   | 0.2 ± 0.0   | 0.2 ± 0.0   | 0.2 ± 0.0   | 0.2 ± 0.0   | 0.09    |
| <b>LIA occ number (cutoff 0) (N)</b>         | 61.9 ± 31.8 | 28.6 ± 17.5 | 17.1 ± 15.4 | 45.8 ± 32.8 | 74.7 ± 33.2 | 32.7 ± 22.1 | 43.5 ± 32.4 | < 0.001 |
| <b>LRA occ number (cutoff 0) (N)</b>         | 16.0 ± 12.6 | 6.9 ± 9.1   | 2.4 ± 2.6   | 11.0 ± 8.4  | 16.9 ± 9.8  | 5.9 ± 4.5   | 9.8 ± 9.8   | < 0.001 |
| <b>Focal occ number (cutoff 0) (N)</b>       | 29.0 ± 13.3 | 9.6 ± 7.7   | 7.3 ± 3.1   | 17.7 ± 15.6 | 23.3 ± 8.7  | 10.9 ± 8.2  | 16.3 ± 12.6 | < 0.001 |

|                                        |             |                |                |             |             |                |                |            |
|----------------------------------------|-------------|----------------|----------------|-------------|-------------|----------------|----------------|------------|
| <b>LIA perc time (cutoff 0) (N)</b>    | 17.9 ± 10.8 | 8.1 ± 5.6      | 4.6 ± 4.2      | 13.2 ± 9.7  | 21.7 ± 10.8 | 9.1 ± 6.5      | 12.5 ± 10.0    | <<br>0.001 |
| <b>LRA perc time (cutoff 0) (N)</b>    | 9.3 ± 8.1   | 3.8 ± 5.4      | 1.1 ± 1.4      | 6.0 ± 4.6   | 8.7 ± 5.5   | 3.2 ± 2.7      | 5.4 ± 5.7      | 0.001      |
| <b>Focal perc time (cutoff 0) (N)</b>  | 3.6 ± 1.7   | 1.2 ± 0.9      | 0.9 ± 0.4      | 2.2 ± 1.9   | 2.9 ± 1.1   | 1.3 ± 1.0      | 2.0 ± 1.6      | <<br>0.001 |
| <b>LIA occ number (cutoff 5) (N)</b>   | 56.5 ± 29.4 | 24.5 ±<br>17.3 | 11.5 ±<br>12.4 | 43.8 ± 34.2 | 71.5 ± 34.1 | 26.4 ±<br>22.5 | 39.0 ±<br>32.6 | <<br>0.001 |
| <b>LRA occ number (cutoff 5) (N)</b>   | 13.5 ± 11.6 | 5.8 ± 8.7      | 1.8 ± 2.1      | 10.1 ± 8.3  | 15.2 ± 8.7  | 5.3 ± 4.6      | 8.6 ± 9.0      | 0.001      |
| <b>Focal occ number (cutoff 5) (N)</b> | 26.2 ± 12.8 | 8.0 ± 7.5      | 5.3 ± 3.0      | 17.3 ± 16.0 | 21.6 ± 9.1  | 9.0 ± 8.2      | 14.6 ±<br>12.5 | <<br>0.001 |
| <b>LIA perc time (cutoff 5) (N)</b>    | 16.7 ± 10.1 | 7.1 ± 5.5      | 3.2 ± 3.5      | 12.7 ± 10.1 | 20.9 ± 11.0 | 7.6 ± 6.7      | 11.4 ±<br>10.0 | <<br>0.001 |
| <b>LRA perc time (cutoff 5) (N)</b>    | 8.1 ± 7.6   | 3.3 ± 5.3      | 0.9 ± 1.1      | 5.5 ± 4.5   | 8.2 ± 5.2   | 2.9 ± 2.8      | 4.8 ± 5.4      | 0.003      |
| <b>Focal perc time (cutoff 5) (N)</b>  | 3.2 ± 1.6   | 1.0 ± 0.9      | 0.6 ± 0.4      | 2.1 ± 2.0   | 2.7 ± 1.1   | 1.1 ± 1.0      | 1.8 ± 1.6      | <<br>0.001 |
| <b>LIA occ number (cutoff 30) (N)</b>  | 31.0 ± 30.0 | 6.7 ± 9.8      | 4.7 ± 9.1      | 28.5 ± 27.7 | 54.5 ± 28.5 | 14.6 ±<br>18.8 | 23.3 ±<br>27.6 | <<br>0.001 |

|                 |                                         |              |              |              |              |              |              |              |         |
|-----------------|-----------------------------------------|--------------|--------------|--------------|--------------|--------------|--------------|--------------|---------|
| <b>Post PVI</b> | <b>LRA occ number (cutoff 30) (N)</b>   | 10.4 ± 10.5  | 3.1 ± 6.2    | 0.3 ± 0.9    | 6.5 ± 6.6    | 10.5 ± 6.8   | 2.4 ± 2.8    | 5.5 ± 7.3    | < 0.001 |
|                 | <b>Focal occ number (cutoff 30) (N)</b> | 20.6 ± 12.3  | 4.6 ± 5.3    | 1.9 ± 2.5    | 14.2 ± 15.2  | 15.6 ± 10.2  | 3.5 ± 3.9    | 10.1 ± 11.5  | < 0.001 |
|                 | <b>LIA perc time (cutoff 30) (N)</b>    | 9.8 ± 10.2   | 2.0 ± 3.1    | 1.3 ± 2.6    | 8.7 ± 8.7    | 16.6 ± 9.5   | 4.4 ± 5.8    | 7.1 ± 8.8    | < 0.001 |
|                 | <b>LRA perc time (cutoff 30) (N)</b>    | 6.4 ± 7.2    | 1.9 ± 3.9    | 0.1 ± 0.4    | 3.6 ± 3.7    | 5.7 ± 4.1    | 1.4 ± 1.8    | 3.2 ± 4.6    | 0.003   |
|                 | <b>Focal perc time (cutoff 30) (N)</b>  | 2.6 ± 1.5    | 0.6 ± 0.7    | 0.2 ± 0.3    | 1.8 ± 1.9    | 1.9 ± 1.3    | 0.4 ± 0.5    | 1.3 ± 1.4    | < 0.001 |
|                 | <b>Global AFCL mean (ms)</b>            | 198.0 ± 18.0 | 198.0 ± 18.0 | 198.0 ± 18.0 | 198.0 ± 18.0 | 198.0 ± 18.0 | 198.0 ± 18.0 | 198.0 ± 17.3 | 1.00    |
|                 | <b>Global AFCL SD (ms)</b>              | 9.6 ± 4.4    | 9.6 ± 4.4    | 9.6 ± 4.4    | 9.6 ± 4.4    | 9.6 ± 4.4    | 9.6 ± 4.4    | 9.6 ± 4.3    | 1.00    |
|                 | <b>Global AFCL CovC</b>                 | 4.8 ± 2.0    | 4.8 ± 2.0    | 4.8 ± 2.0    | 4.8 ± 2.0    | 4.8 ± 2.0    | 4.8 ± 2.0    | 4.8 ± 1.9    | 1.00    |
|                 | <b>Regional AFCL mean (ms)</b>          | 197.0 ± 19.5 | 196.7 ± 18.0 | 204.7 ± 21.7 | 194.8 ± 20.2 | 196.8 ± 18.2 | 198.0 ± 17.2 | 198.0 ± 18.7 | 0.87    |
|                 | <b>Regional AFCL SD (ms)</b>            | 6.8 ± 2.9    | 5.0 ± 2.3    | 7.2 ± 4.2    | 4.7 ± 3.3    | 7.6 ± 4.1    | 5.8 ± 2.3    | 6.2 ± 3.3    | 0.20    |
|                 | <b>Regional AFCL CovC</b>               | 3.4 ± 1.5    | 2.5 ± 1.0    | 3.5 ± 2.0    | 2.4 ± 1.6    | 3.8 ± 1.9    | 2.9 ± 1.0    | 3.1 ± 1.6    | 0.19    |

|                                              |             |             |             |             |             |             |             |         |
|----------------------------------------------|-------------|-------------|-------------|-------------|-------------|-------------|-------------|---------|
| <b>Global Intra Chamber Coherence mean</b>   | 0.4 ± 0.1   | 0.4 ± 0.1   | 0.4 ± 0.1   | 0.4 ± 0.1   | 0.4 ± 0.1   | 0.4 ± 0.1   | 0.4 ± 0.1   | 1.00    |
| <b>Global Intra Chamber Coherence max</b>    | 0.5 ± 0.1   | 0.5 ± 0.1   | 0.5 ± 0.1   | 0.5 ± 0.1   | 0.5 ± 0.1   | 0.5 ± 0.1   | 0.5 ± 0.1   | 1.00    |
| <b>Global Intra Chamber Coherence SD</b>     | 0.1 ± 0.0   | 0.1 ± 0.0   | 0.1 ± 0.0   | 0.1 ± 0.0   | 0.1 ± 0.0   | 0.1 ± 0.0   | 0.1 ± 0.0   | 1.00    |
| <b>Regional Intra Chamber Coherence mean</b> | 0.4 ± 0.2   | 0.4 ± 0.2   | 0.4 ± 0.1   | 0.4 ± 0.2   | 0.4 ± 0.2   | 0.4 ± 0.1   | 0.4 ± 0.2   | 0.99    |
| <b>Regional Intra Chamber Coherence max</b>  | 0.5 ± 0.2   | 0.5 ± 0.2   | 0.5 ± 0.2   | 0.5 ± 0.2   | 0.5 ± 0.1   | 0.5 ± 0.2   | 0.5 ± 0.1   | 0.99    |
| <b>Regional Intra Chamber Coherence SD</b>   | 0.1 ± 0.0   | 0.0 ± 0.0   | 0.0 ± 0.0   | 0.0 ± 0.0   | 0.1 ± 0.0   | 0.0 ± 0.0   | 0.1 ± 0.0   | 0.19    |
| <b>Global Recurrence Mean</b>                | 0.4 ± 0.1   | 0.4 ± 0.1   | 0.4 ± 0.1   | 0.4 ± 0.1   | 0.4 ± 0.1   | 0.4 ± 0.1   | 0.4 ± 0.1   | 1.00    |
| <b>Global Recurrence SD</b>                  | 0.2 ± 0.0   | 0.2 ± 0.0   | 0.2 ± 0.0   | 0.2 ± 0.0   | 0.2 ± 0.0   | 0.2 ± 0.0   | 0.2 ± 0.0   | 1.00    |
| <b>Regional Recurrence Mean</b>              | 0.6 ± 0.2   | 0.7 ± 0.1   | 0.8 ± 0.1   | 0.7 ± 0.1   | 0.6 ± 0.1   | 0.7 ± 0.1   | 0.6 ± 0.1   | < 0.001 |
| <b>Regional Recurrence SD</b>                | 0.2 ± 0.0   | 0.2 ± 0.0   | 0.2 ± 0.0   | 0.2 ± 0.1   | 0.2 ± 0.0   | 0.2 ± 0.0   | 0.2 ± 0.0   | 0.88    |
| <b>LIA occ number (cutoff 0) (N)</b>         | 76.6 ± 44.4 | 35.0 ± 27.1 | 17.4 ± 14.0 | 38.4 ± 21.5 | 65.2 ± 40.3 | 24.7 ± 14.1 | 42.9 ± 35.4 | < 0.001 |
| <b>LRA occ number (cutoff 0) (N)</b>         | 17.3 ± 17.4 | 6.4 ± 6.3   | 3.2 ± 5.4   | 7.5 ± 8.7   | 12.6 ± 14.5 | 5.1 ± 5.5   | 8.7 ± 11.4  | 0.03    |
| <b>Focal occ number (cutoff 0) (N)</b>       | 25.6 ± 13.0 | 11.3 ± 8.7  | 8.1 ± 5.7   | 10.9 ± 7.1  | 26.1 ± 11.8 | 11.5 ± 6.5  | 15.6 ± 11.5 | < 0.001 |

|                                         |             |                |               |             |                |                |                |         |
|-----------------------------------------|-------------|----------------|---------------|-------------|----------------|----------------|----------------|---------|
| <b>LIA perc time (cutoff 0) (N)</b>     | 21.8 ± 14.0 | 9.1 ± 7.3      | 4.7 ± 4.1     | 11.2 ± 6.9  | 18.2 ± 12.0    | 6.7 ± 3.9      | 11.9 ± 10.5    | < 0.001 |
| <b>LRA perc time (cutoff 0) (N)</b>     | 9.7 ± 9.6   | 3.4 ± 3.3      | 1.6 ± 2.5     | 4.7 ± 6.6   | 6.4 ± 6.7      | 2.9 ± 3.2      | 4.8 ± 6.3      | 0.027   |
| <b>Focal perc time (cutoff 0) (N)</b>   | 3.1 ± 1.6   | 1.4 ± 1.0      | 0.9 ± 0.6     | 1.3 ± 0.9   | 3.2 ± 1.4      | 1.4 ± 0.8      | 1.9 ± 1.4      | < 0.001 |
| <b>LIA occ number (cutoff 5) (N)</b>    | 71.7 ± 43.9 | 26.6 ±<br>21.8 | 11.7 ±<br>9.0 | 34.2 ± 20.4 | 60.4 ±<br>38.6 | 17.5 ±<br>10.8 | 37.0 ±<br>34.4 | < 0.001 |
| <b>LRA occ number (cutoff 5) (N)</b>    | 16.3 ± 16.8 | 4.8 ± 5.4      | 2.5 ± 4.8     | 6.7 ± 8.0   | 11.4 ± 13.5    | 4.5 ± 5.6      | 7.7 ± 10.8     | 0.022   |
| <b>Focal occ number (cutoff 5) (N)</b>  | 22.7 ± 13.7 | 9.7 ± 8.1      | 6.7 ± 5.8     | 9.4 ± 7.0   | 23.5 ± 12.9    | 10.5 ± 6.1     | 13.8 ± 11.4    | < 0.001 |
| <b>LIA perc time (cutoff 5) (N)</b>     | 20.8 ± 14.0 | 7.1 ± 6.0      | 3.3 ± 2.7     | 10.3 ± 6.9  | 17.1 ± 11.8    | 4.8 ± 2.9      | 10.6 ± 10.4    | < 0.001 |
| <b>LRA perc time (cutoff 5) (N)</b>     | 9.4 ± 9.4   | 2.6 ± 2.8      | 1.2 ± 2.1     | 4.3 ± 6.3   | 5.9 ± 6.3      | 2.6 ± 3.2      | 4.3 ± 6.1      | 0.017   |
| <b>Focal perc time (cutoff 5) (N)</b>   | 2.8 ± 1.7   | 1.2 ± 1.0      | 0.8 ± 0.7     | 1.2 ± 0.8   | 2.9 ± 1.5      | 1.3 ± 0.8      | 1.7 ± 1.4      | < 0.001 |
| <b>LIA occ number (cutoff 30) (N)</b>   | 51.3 ± 38.6 | 10.4 ±<br>11.3 | 3.0 ± 5.2     | 22.5 ± 22.1 | 40.2 ± 30.0    | 6.5 ± 6.4      | 22.3 ±<br>28.3 | < 0.001 |
| <b>LRA occ number (cutoff 30) (N)</b>   | 11.3 ± 14.4 | 2.3 ± 3.2      | 1.4 ± 4.2     | 4.0 ± 7.8   | 7.8 ± 8.9      | 3.0 ± 4.5      | 5.0 ± 8.6      | 0.045   |
| <b>Focal occ number (cutoff 30) (N)</b> | 15.7 ± 14.5 | 6.5 ± 8.5      | 3.6 ± 4.5     | 6.2 ± 6.5   | 16.3 ± 12.7    | 6.6 ± 5.5      | 9.2 ± 10.4     | 0.007   |

|                 |                                            |              |              |              |              |              |              |              |         |
|-----------------|--------------------------------------------|--------------|--------------|--------------|--------------|--------------|--------------|--------------|---------|
| <b>Post PWI</b> | <b>LIA perc time (cutoff 30) (N)</b>       | 15.7 ± 12.9  | 2.8 ± 3.1    | 0.8 ± 1.4    | 6.9 ± 7.5    | 12.1 ± 9.9   | 1.8 ± 1.8    | 6.7 ± 9.1    | < 0.001 |
|                 | <b>LRA perc time (cutoff 30) (N)</b>       | 6.7 ± 8.4    | 1.2 ± 1.8    | 0.6 ± 1.8    | 2.8 ± 6.4    | 4.5 ± 4.8    | 1.7 ± 2.6    | 2.9 ± 5.2    | 0.055   |
|                 | <b>Focal perc time (cutoff 30) (N)</b>     | 1.9 ± 1.8    | 0.8 ± 1.0    | 0.5 ± 0.6    | 0.8 ± 0.8    | 2.0 ± 1.5    | 0.8 ± 0.7    | 1.1 ± 1.3    | 0.007   |
|                 | <b>Global AFCL mean (ms)</b>               | 201.6 ± 17.8 | 201.6 ± 17.8 | 201.6 ± 17.8 | 201.6 ± 17.8 | 201.6 ± 17.8 | 201.6 ± 17.8 | 201.6 ± 16.8 | 1.00    |
|                 | <b>Global AFCL SD (ms)</b>                 | 7.9 ± 4.2    | 7.9 ± 4.2    | 7.9 ± 4.2    | 7.9 ± 4.2    | 7.9 ± 4.2    | 7.9 ± 4.2    | 7.9 ± 4.0    | 1.00    |
|                 | <b>Global AFCL CovC</b>                    | 3.9 ± 2.1    | 3.9 ± 2.1    | 3.9 ± 2.1    | 3.9 ± 2.1    | 3.9 ± 2.1    | 3.9 ± 2.1    | 3.9 ± 1.9    | 1.00    |
|                 | <b>Regional AFCL mean (ms)</b>             | 200.1 ± 20.8 | 200.8 ± 19.3 | 208.9 ± 20.1 | 199.0 ± 15.7 | 200.0 ± 15.3 | 202.0 ± 18.8 | 201.8 ± 17.8 | 0.90    |
|                 | <b>Regional AFCL SD (ms)</b>               | 6.7 ± 4.0    | 5.2 ± 3.7    | 6.0 ± 3.7    | 6.7 ± 4.8    | 6.1 ± 2.9    | 5.9 ± 3.9    | 6.1 ± 3.7    | 0.97    |
|                 | <b>Regional AFCL CovC</b>                  | 3.4 ± 2.2    | 2.6 ± 1.9    | 2.8 ± 1.7    | 3.3 ± 2.4    | 3.1 ± 1.6    | 2.9 ± 1.7    | 3.0 ± 1.9    | 0.97    |
|                 | <b>Global Intra Chamber Coherence mean</b> | 0.4 ± 0.1    | 0.4 ± 0.1    | 0.4 ± 0.1    | 0.4 ± 0.1    | 0.4 ± 0.1    | 0.4 ± 0.1    | 0.4 ± 0.1    | 1.00    |
|                 | <b>Global Intra Chamber Coherence max</b>  | 0.5 ± 0.1    | 0.5 ± 0.1    | 0.5 ± 0.1    | 0.5 ± 0.1    | 0.5 ± 0.1    | 0.5 ± 0.1    | 0.5 ± 0.1    | 1.00    |
|                 | <b>Global Intra Chamber Coherence SD</b>   | 0.1 ± 0.0    | 0.1 ± 0.0    | 0.1 ± 0.0    | 0.1 ± 0.0    | 0.1 ± 0.0    | 0.1 ± 0.0    | 0.1 ± 0.0    | 1.00    |

|                                              |             |             |           |             |             |            |             |         |
|----------------------------------------------|-------------|-------------|-----------|-------------|-------------|------------|-------------|---------|
| <b>Regional Intra Chamber Coherence mean</b> | 0.4 ± 0.2   | 0.4 ± 0.2   | 0.5 ± 0.1 | 0.4 ± 0.1   | 0.4 ± 0.2   | 0.4 ± 0.1  | 0.4 ± 0.1   | 0.87    |
| <b>Regional Intra Chamber Coherence max</b>  | 0.5 ± 0.2   | 0.5 ± 0.1   | 0.5 ± 0.1 | 0.5 ± 0.1   | 0.5 ± 0.1   | 0.5 ± 0.1  | 0.5 ± 0.1   | 0.99    |
| <b>Regional Intra Chamber Coherence SD</b>   | 0.1 ± 0.0   | 0.1 ± 0.0   | 0.0 ± 0.0 | 0.1 ± 0.0   | 0.1 ± 0.0   | 0.0 ± 0.0  | 0.1 ± 0.0   | 0.29    |
| <b>Global Recurrence Mean</b>                | 0.4 ± 0.1   | 0.4 ± 0.1   | 0.4 ± 0.1 | 0.4 ± 0.1   | 0.4 ± 0.1   | 0.4 ± 0.1  | 0.4 ± 0.1   | 1.00    |
| <b>Global Recurrence SD</b>                  | 0.2 ± 0.0   | 0.2 ± 0.0   | 0.2 ± 0.0 | 0.2 ± 0.0   | 0.2 ± 0.0   | 0.2 ± 0.0  | 0.2 ± 0.0   | 1.00    |
| <b>Regional Recurrence Mean</b>              | 0.6 ± 0.1   | 0.7 ± 0.1   | 0.8 ± 0.1 | 0.6 ± 0.1   | 0.5 ± 0.1   | 0.7 ± 0.1  | 0.6 ± 0.1   | < 0.001 |
| <b>Regional Recurrence SD</b>                | 0.2 ± 0.0   | 0.2 ± 0.0   | 0.2 ± 0.1 | 0.2 ± 0.0   | 0.2 ± 0.0   | 0.2 ± 0.0  | 0.2 ± 0.0   | 0.53    |
| <b>LIA occ number (cutoff 0) (N)</b>         | 72.6 ± 28.6 | 24.2 ± 12.7 | 8.6 ± 7.0 | 45.6 ± 22.4 | 59.6 ± 32.2 | 16.2 ± 8.1 | 37.8 ± 30.7 | < 0.001 |
| <b>LRA occ number (cutoff 0) (N)</b>         | 11.8 ± 7.0  | 3.5 ± 2.1   | 1.2 ± 2.1 | 5.5 ± 4.3   | 10.1 ± 7.9  | 5.0 ± 5.0  | 6.2 ± 6.2   | 0.002   |
| <b>Focal occ number (cutoff 0) (N)</b>       | 27.8 ± 12.3 | 12.0 ± 10.2 | 2.6 ± 3.5 | 17.2 ± 10.5 | 26.6 ± 15.2 | 10.8 ± 6.9 | 16.2 ± 13.4 | < 0.001 |
| <b>LIA perc time (cutoff 0) (N)</b>          | 20.5 ± 8.2  | 6.7 ± 3.6   | 2.5 ± 2.1 | 13.0 ± 6.7  | 16.8 ± 9.3  | 4.3 ± 2.0  | 10.6 ± 8.8  | < 0.001 |
| <b>LRA perc time (cutoff 0) (N)</b>          | 7.1 ± 5.1   | 1.7 ± 1.1   | 0.5 ± 0.8 | 3.0 ± 2.5   | 5.7 ± 5.1   | 2.9 ± 2.8  | 3.5 ± 3.9   | 0.003   |



|                                         |             |             |           |             |             |            |             |         |
|-----------------------------------------|-------------|-------------|-----------|-------------|-------------|------------|-------------|---------|
| <b>Focal perc time (cutoff 0) (N)</b>   | 3.4 ± 1.5   | 1.5 ± 1.3   | 0.3 ± 0.4 | 2.1 ± 1.3   | 3.3 ± 1.8   | 1.4 ± 0.9  | 2.0 ± 1.6   | < 0.001 |
| <b>LIA occ number (cutoff 5) (N)</b>    | 70.0 ± 28.4 | 20.0 ± 13.6 | 4.2 ± 4.8 | 43.9 ± 21.9 | 55.6 ± 33.0 | 10.8 ± 6.0 | 34.1 ± 31.4 | < 0.001 |
| <b>LRA occ number (cutoff 5) (N)</b>    | 10.5 ± 7.4  | 2.6 ± 2.2   | 0.9 ± 1.6 | 4.1 ± 3.8   | 9.4 ± 7.9   | 4.6 ± 4.4  | 5.4 ± 6.0   | 0.003   |
| <b>Focal occ number (cutoff 5) (N)</b>  | 25.2 ± 12.9 | 10.2 ± 9.2  | 1.5 ± 3.1 | 15.0 ± 11.6 | 25.1 ± 16.0 | 9.6 ± 7.1  | 14.5 ± 13.4 | < 0.001 |
| <b>LIA perc time (cutoff 5) (N)</b>     | 19.9 ± 8.2  | 5.6 ± 3.8   | 1.3 ± 1.5 | 12.6 ± 6.6  | 15.8 ± 9.5  | 2.9 ± 1.7  | 9.7 ± 9.0   | < 0.001 |
| <b>LRA perc time (cutoff 5) (N)</b>     | 6.6 ± 5.4   | 1.4 ± 1.1   | 0.3 ± 0.6 | 2.5 ± 2.3   | 5.3 ± 5.0   | 2.7 ± 2.6  | 3.1 ± 3.8   | 0.004   |
| <b>Focal perc time (cutoff 5) (N)</b>   | 3.1 ± 1.6   | 1.3 ± 1.2   | 0.2 ± 0.4 | 1.9 ± 1.4   | 3.1 ± 2.0   | 1.2 ± 0.9  | 1.8 ± 1.6   | < 0.001 |
| <b>LIA occ number (cutoff 30) (N)</b>   | 49.0 ± 29.9 | 8.0 ± 7.7   | 0.0 ± 0.0 | 28.2 ± 18.3 | 38.4 ± 31.4 | 2.2 ± 2.9  | 21.0 ± 26.4 | < 0.001 |
| <b>LRA occ number (cutoff 30) (N)</b>   | 7.4 ± 5.1   | 1.2 ± 2.1   | 0.0 ± 0.0 | 2.9 ± 4.2   | 6.0 ± 7.3   | 2.9 ± 4.1  | 3.4 ± 4.9   | 0.015   |
| <b>Focal occ number (cutoff 30) (N)</b> | 16.9 ± 11.3 | 5.5 ± 6.2   | 0.1 ± 0.4 | 11.8 ± 9.6  | 21.0 ± 14.0 | 6.1 ± 4.9  | 10.2 ± 11.1 | < 0.001 |
| <b>LIA perc time (cutoff 30) (N)</b>    | 14.7 ± 9.4  | 2.2 ± 2.0   | 0.0 ± 0.0 | 8.7 ± 5.9   | 11.4 ± 9.1  | 0.6 ± 0.8  | 6.3 ± 8.0   | < 0.001 |

|                                        |           |           |           |           |           |           |           |            |
|----------------------------------------|-----------|-----------|-----------|-----------|-----------|-----------|-----------|------------|
| <b>LRA perc time (cutoff 30) (N)</b>   | 4.9 ± 3.9 | 0.6 ± 1.0 | 0.0 ± 0.0 | 1.7 ± 2.5 | 3.6 ± 4.7 | 1.7 ± 2.2 | 2.1 ± 3.2 | 0.013      |
| <b>Focal perc time (cutoff 30) (N)</b> | 2.1 ± 1.4 | 0.7 ± 0.8 | 0.0 ± 0.0 | 1.5 ± 1.2 | 2.6 ± 1.7 | 0.8 ± 0.6 | 1.3 ± 1.4 | <<br>0.001 |

AFCL: atrial fibrillation cycle length; FCA: focal centrifugal activation; LIA: localized irregular activation; LRA: localized rotational activation;

PVI: pulmonary vein isolation; SD: standard deviation.

## Supplementary Table S2.

Charge density map data by procedural step and region

| <b>Region</b>   |                                              | <b>Baseline<br/>(N=66)</b> | <b>Post PVI<br/>(N=66)</b> | <b>Post PWI<br/>(N=66)</b> | <b>Total<br/>(N=198)</b> | <b>p<br/>value</b> |
|-----------------|----------------------------------------------|----------------------------|----------------------------|----------------------------|--------------------------|--------------------|
| <b>Anterior</b> | <b>Global AFCL mean (ms)</b>                 | 184.4 ± 15.0               | 198.0 ± 18.0               | 201.6 ± 17.8               | 194.0 ± 18.0             | 0.07               |
|                 | <b>Global AFCL SD (ms)</b>                   | 6.5 ± 1.9                  | 9.6 ± 4.4                  | 7.9 ± 4.2                  | 8.0 ± 3.8                | 0.16               |
|                 | <b>Global AFCL CovC</b>                      | 3.6 ± 1.1                  | 4.8 ± 2.0                  | 3.9 ± 2.1                  | 4.1 ± 1.8                | 0.28               |
|                 | <b>Regional AFCL mean (ms)</b>               | 185.4 ± 15.5               | 197.0 ± 19.5               | 200.1 ± 20.8               | 193.6 ± 19.0             | 0.19               |
|                 | <b>Regional AFCL SD (ms)</b>                 | 6.6 ± 2.6                  | 6.8 ± 2.9                  | 6.7 ± 4.0                  | 6.7 ± 3.0                | 0.99               |
|                 | <b>Regional AFCL CovC</b>                    | 3.5 ± 1.3                  | 3.4 ± 1.5                  | 3.4 ± 2.2                  | 3.5 ± 1.6                | 0.97               |
|                 | <b>Global Intra Chamber Coherence mean</b>   | 0.4 ± 0.1                  | 0.4 ± 0.1                  | 0.4 ± 0.1                  | 0.4 ± 0.1                | 0.76               |
|                 | <b>Global Intra Chamber Coherence max</b>    | 0.5 ± 0.1                  | 0.5 ± 0.1                  | 0.5 ± 0.1                  | 0.5 ± 0.1                | 0.89               |
|                 | <b>Global Intra Chamber Coherence SD</b>     | 0.1 ± 0.0                  | 0.1 ± 0.0                  | 0.1 ± 0.0                  | 0.1 ± 0.0                | 0.87               |
|                 | <b>Regional Intra Chamber Coherence mean</b> | 0.3 ± 0.1                  | 0.4 ± 0.2                  | 0.4 ± 0.2                  | 0.4 ± 0.2                | 0.63               |
|                 | <b>Regional Intra Chamber Coherence max</b>  | 0.5 ± 0.1                  | 0.5 ± 0.2                  | 0.5 ± 0.2                  | 0.5 ± 0.1                | 0.85               |

|                                            |             |             |             |             |      |
|--------------------------------------------|-------------|-------------|-------------|-------------|------|
| <b>Regional Intra Chamber Coherence SD</b> | 0.1 ± 0.0   | 0.1 ± 0.0   | 0.1 ± 0.0   | 0.1 ± 0.0   | 0.92 |
| <b>Global Recurrence Mean</b>              | 0.4 ± 0.1   | 0.4 ± 0.1   | 0.4 ± 0.1   | 0.4 ± 0.1   | 0.78 |
| <b>Global Recurrence SD</b>                | 0.2 ± 0.0   | 0.2 ± 0.0   | 0.2 ± 0.0   | 0.2 ± 0.0   | 0.99 |
| <b>Regional Recurrence Mean</b>            | 0.5 ± 0.1   | 0.6 ± 0.2   | 0.6 ± 0.1   | 0.5 ± 0.1   | 0.46 |
| <b>Regional Recurrence SD</b>              | 0.2 ± 0.0   | 0.2 ± 0.0   | 0.2 ± 0.0   | 0.2 ± 0.0   | 0.54 |
| <b>LIA occ number (cutoff 0) (N)</b>       | 61.9 ± 31.8 | 76.6 ± 44.4 | 72.6 ± 28.6 | 70.2 ± 35.6 | 0.63 |
| <b>LRA occ number (cutoff 0) (N)</b>       | 16.0 ± 12.6 | 17.3 ± 17.4 | 11.8 ± 7.0  | 15.3 ± 13.3 | 0.67 |
| <b>Focal occ number (cutoff 0) (N)</b>     | 29.0 ± 13.3 | 25.6 ± 13.0 | 27.8 ± 12.3 | 27.4 ± 12.6 | 0.83 |
| <b>LIA perc time (cutoff 0) (N)</b>        | 17.9 ± 10.8 | 21.8 ± 14.0 | 20.5 ± 8.2  | 20.0 ± 11.3 | 0.73 |
| <b>LRA perc time (cutoff 0) (N)</b>        | 9.3 ± 8.1   | 9.7 ± 9.6   | 7.1 ± 5.1   | 8.9 ± 7.9   | 0.76 |
| <b>Focal perc time (cutoff 0) (N)</b>      | 3.6 ± 1.7   | 3.1 ± 1.6   | 3.4 ± 1.5   | 3.4 ± 1.6   | 0.80 |
| <b>LIA occ number (cutoff 5) (N)</b>       | 56.5 ± 29.4 | 71.7 ± 43.9 | 70.0 ± 28.4 | 65.7 ± 34.8 | 0.56 |
| <b>LRA occ number (cutoff 5) (N)</b>       | 13.5 ± 11.6 | 16.3 ± 16.8 | 10.5 ± 7.4  | 13.7 ± 12.7 | 0.64 |
| <b>Focal occ number (cutoff 5) (N)</b>     | 26.2 ± 12.8 | 22.7 ± 13.7 | 25.2 ± 12.9 | 24.7 ± 12.8 | 0.82 |

|               |                                         |              |              |              |              |      |
|---------------|-----------------------------------------|--------------|--------------|--------------|--------------|------|
|               | <b>LIA perc time (cutoff 5) (N)</b>     | 16.7 ± 10.1  | 20.8 ± 14.0  | 19.9 ± 8.2   | 19.1 ± 11.0  | 0.67 |
|               | <b>LRA perc time (cutoff 5) (N)</b>     | 8.1 ± 7.6    | 9.4 ± 9.4    | 6.6 ± 5.4    | 8.2 ± 7.7    | 0.75 |
|               | <b>Focal perc time (cutoff 5) (N)</b>   | 3.2 ± 1.6    | 2.8 ± 1.7    | 3.1 ± 1.6    | 3.0 ± 1.6    | 0.80 |
|               | <b>LIA occ number (cutoff 30) (N)</b>   | 31.0 ± 30.0  | 51.3 ± 38.6  | 49.0 ± 29.9  | 43.2 ± 33.6  | 0.32 |
|               | <b>LRA occ number (cutoff 30) (N)</b>   | 10.4 ± 10.5  | 11.3 ± 14.4  | 7.4 ± 5.1    | 9.9 ± 10.9   | 0.74 |
|               | <b>Focal occ number (cutoff 30) (N)</b> | 20.6 ± 12.3  | 15.7 ± 14.5  | 16.9 ± 11.3  | 17.8 ± 12.7  | 0.66 |
|               | <b>LIA perc time (cutoff 30) (N)</b>    | 9.8 ± 10.2   | 15.7 ± 12.9  | 14.7 ± 9.4   | 13.3 ± 11.1  | 0.43 |
|               | <b>LRA perc time (cutoff 30) (N)</b>    | 6.4 ± 7.2    | 6.7 ± 8.4    | 4.9 ± 3.9    | 6.1 ± 6.8    | 0.86 |
|               | <b>Focal perc time (cutoff 30) (N)</b>  | 2.6 ± 1.5    | 1.9 ± 1.8    | 2.1 ± 1.4    | 2.2 ± 1.6    | 0.65 |
| <b>Septal</b> | <b>Global AFCL mean (ms)</b>            | 184.4 ± 15.0 | 198.0 ± 18.0 | 201.6 ± 17.8 | 194.0 ± 18.0 | 0.07 |
|               | <b>Global AFCL SD (ms)</b>              | 6.5 ± 1.9    | 9.6 ± 4.4    | 7.9 ± 4.2    | 8.0 ± 3.8    | 0.16 |
|               | <b>Global AFCL CovC</b>                 | 3.6 ± 1.1    | 4.8 ± 2.0    | 3.9 ± 2.1    | 4.1 ± 1.8    | 0.28 |
|               | <b>Regional AFCL mean (ms)</b>          | 184.9 ± 16.9 | 196.7 ± 18.0 | 200.8 ± 19.3 | 193.5 ± 18.6 | 0.14 |
|               | <b>Regional AFCL SD (ms)</b>            | 4.7 ± 2.2    | 5.0 ± 2.3    | 5.2 ± 3.7    | 4.9 ± 2.6    | 0.91 |

|                                              |             |             |             |             |      |
|----------------------------------------------|-------------|-------------|-------------|-------------|------|
| <b>Regional AFCL CovC</b>                    | 2.5 ± 1.3   | 2.5 ± 1.0   | 2.6 ± 1.9   | 2.6 ± 1.3   | 0.99 |
| <b>Global Intra Chamber Coherence mean</b>   | 0.4 ± 0.1   | 0.4 ± 0.1   | 0.4 ± 0.1   | 0.4 ± 0.1   | 0.76 |
| <b>Global Intra Chamber Coherence max</b>    | 0.5 ± 0.1   | 0.5 ± 0.1   | 0.5 ± 0.1   | 0.5 ± 0.1   | 0.89 |
| <b>Global Intra Chamber Coherence SD</b>     | 0.1 ± 0.0   | 0.1 ± 0.0   | 0.1 ± 0.0   | 0.1 ± 0.0   | 0.87 |
| <b>Regional Intra Chamber Coherence mean</b> | 0.4 ± 0.1   | 0.4 ± 0.2   | 0.4 ± 0.2   | 0.4 ± 0.1   | 0.64 |
| <b>Regional Intra Chamber Coherence max</b>  | 0.5 ± 0.1   | 0.5 ± 0.2   | 0.5 ± 0.1   | 0.5 ± 0.1   | 0.92 |
| <b>Regional Intra Chamber Coherence SD</b>   | 0.1 ± 0.0   | 0.0 ± 0.0   | 0.1 ± 0.0   | 0.1 ± 0.0   | 0.56 |
| <b>Global Recurrence Mean</b>                | 0.4 ± 0.1   | 0.4 ± 0.1   | 0.4 ± 0.1   | 0.4 ± 0.1   | 0.78 |
| <b>Global Recurrence SD</b>                  | 0.2 ± 0.0   | 0.2 ± 0.0   | 0.2 ± 0.0   | 0.2 ± 0.0   | 0.99 |
| <b>Regional Recurrence Mean</b>              | 0.6 ± 0.1   | 0.7 ± 0.1   | 0.7 ± 0.1   | 0.6 ± 0.1   | 0.46 |
| <b>Regional Recurrence SD</b>                | 0.2 ± 0.0   | 0.2 ± 0.0   | 0.2 ± 0.0   | 0.2 ± 0.0   | 0.42 |
| <b>LIA occ number (cutoff 0) (N)</b>         | 28.6 ± 17.5 | 35.0 ± 27.1 | 24.2 ± 12.7 | 29.8 ± 20.4 | 0.53 |
| <b>LRA occ number (cutoff 0) (N)</b>         | 6.9 ± 9.1   | 6.4 ± 6.3   | 3.5 ± 2.1   | 5.8 ± 6.8   | 0.54 |
| <b>Focal occ number (cutoff 0) (N)</b>       | 9.6 ± 7.7   | 11.3 ± 8.7  | 12.0 ± 10.2 | 10.9 ± 8.5  | 0.83 |

|                                         |             |             |             |             |      |
|-----------------------------------------|-------------|-------------|-------------|-------------|------|
| <b>LIA perc time (cutoff 0) (N)</b>     | 8.1 ± 5.6   | 9.1 ± 7.3   | 6.7 ± 3.6   | 8.1 ± 5.8   | 0.69 |
| <b>LRA perc time (cutoff 0) (N)</b>     | 3.8 ± 5.4   | 3.4 ± 3.3   | 1.7 ± 1.1   | 3.1 ± 3.8   | 0.49 |
| <b>Focal perc time (cutoff 0) (N)</b>   | 1.2 ± 0.9   | 1.4 ± 1.0   | 1.5 ± 1.3   | 1.3 ± 1.0   | 0.77 |
| <b>LIA occ number (cutoff 5) (N)</b>    | 24.5 ± 17.3 | 26.6 ± 21.8 | 20.0 ± 13.6 | 24.1 ± 17.9 | 0.74 |
| <b>LRA occ number (cutoff 5) (N)</b>    | 5.8 ± 8.7   | 4.8 ± 5.4   | 2.6 ± 2.2   | 4.6 ± 6.2   | 0.55 |
| <b>Focal occ number (cutoff 5) (N)</b>  | 8.0 ± 7.5   | 9.7 ± 8.1   | 10.2 ± 9.2  | 9.2 ± 7.9   | 0.81 |
| <b>LIA perc time (cutoff 5) (N)</b>     | 7.1 ± 5.5   | 7.1 ± 6.0   | 5.6 ± 3.8   | 6.7 ± 5.1   | 0.78 |
| <b>LRA perc time (cutoff 5) (N)</b>     | 3.3 ± 5.3   | 2.6 ± 2.8   | 1.4 ± 1.1   | 2.5 ± 3.6   | 0.53 |
| <b>Focal perc time (cutoff 5) (N)</b>   | 1.0 ± 0.9   | 1.2 ± 1.0   | 1.3 ± 1.2   | 1.1 ± 1.0   | 0.75 |
| <b>LIA occ number (cutoff 30) (N)</b>   | 6.7 ± 9.8   | 10.4 ± 11.3 | 8.0 ± 7.7   | 8.4 ± 9.7   | 0.69 |
| <b>LRA occ number (cutoff 30) (N)</b>   | 3.1 ± 6.2   | 2.3 ± 3.2   | 1.2 ± 2.1   | 2.3 ± 4.3   | 0.67 |
| <b>Focal occ number (cutoff 30) (N)</b> | 4.6 ± 5.3   | 6.5 ± 8.5   | 5.5 ± 6.2   | 5.6 ± 6.7   | 0.81 |
| <b>LIA perc time (cutoff 30) (N)</b>    | 2.0 ± 3.1   | 2.8 ± 3.1   | 2.2 ± 2.0   | 2.4 ± 2.8   | 0.79 |
| <b>LRA perc time (cutoff 30) (N)</b>    | 1.9 ± 3.9   | 1.2 ± 1.8   | 0.6 ± 1.0   | 1.3 ± 2.6   | 0.59 |

|                |                                              |              |              |              |              |       |
|----------------|----------------------------------------------|--------------|--------------|--------------|--------------|-------|
|                | <b>Focal perc time (cutoff 30) (N)</b>       | 0.6 ± 0.7    | 0.8 ± 1.0    | 0.7 ± 0.8    | 0.7 ± 0.8    | 0.83  |
| <b>Lateral</b> | <b>Global AFCL mean (ms)</b>                 | 184.4 ± 15.0 | 198.0 ± 18.0 | 201.6 ± 17.8 | 194.0 ± 18.0 | 0.07  |
|                | <b>Global AFCL SD (ms)</b>                   | 6.5 ± 1.9    | 9.6 ± 4.4    | 7.9 ± 4.2    | 8.0 ± 3.8    | 0.16  |
|                | <b>Global AFCL CovC</b>                      | 3.6 ± 1.1    | 4.8 ± 2.0    | 3.9 ± 2.1    | 4.1 ± 1.8    | 0.28  |
|                | <b>Regional AFCL mean (ms)</b>               | 188.1 ± 14.6 | 204.7 ± 21.7 | 208.9 ± 20.1 | 199.7 ± 20.4 | 0.048 |
|                | <b>Regional AFCL SD (ms)</b>                 | 4.7 ± 1.8    | 7.2 ± 4.2    | 6.0 ± 3.7    | 6.0 ± 3.4    | 0.24  |
|                | <b>Regional AFCL CovC</b>                    | 2.5 ± 1.0    | 3.5 ± 2.0    | 2.8 ± 1.7    | 3.0 ± 1.6    | 0.38  |
|                | <b>Global Intra Chamber Coherence mean</b>   | 0.4 ± 0.1    | 0.4 ± 0.1    | 0.4 ± 0.1    | 0.4 ± 0.1    | 0.76  |
|                | <b>Global Intra Chamber Coherence max</b>    | 0.5 ± 0.1    | 0.5 ± 0.1    | 0.5 ± 0.1    | 0.5 ± 0.1    | 0.89  |
|                | <b>Global Intra Chamber Coherence SD</b>     | 0.1 ± 0.0    | 0.1 ± 0.0    | 0.1 ± 0.0    | 0.1 ± 0.0    | 0.87  |
|                | <b>Regional Intra Chamber Coherence mean</b> | 0.4 ± 0.1    | 0.4 ± 0.1    | 0.5 ± 0.1    | 0.4 ± 0.1    | 0.50  |
|                | <b>Regional Intra Chamber Coherence max</b>  | 0.5 ± 0.1    | 0.5 ± 0.2    | 0.5 ± 0.1    | 0.5 ± 0.1    | 0.76  |
|                | <b>Regional Intra Chamber Coherence SD</b>   | 0.0 ± 0.0    | 0.0 ± 0.0    | 0.0 ± 0.0    | 0.0 ± 0.0    | 0.66  |
|                | <b>Global Recurrence Mean</b>                | 0.4 ± 0.1    | 0.4 ± 0.1    | 0.4 ± 0.1    | 0.4 ± 0.1    | 0.78  |



|                                        |             |             |           |             |       |
|----------------------------------------|-------------|-------------|-----------|-------------|-------|
| <b>Global Recurrence SD</b>            | 0.2 ± 0.0   | 0.2 ± 0.0   | 0.2 ± 0.0 | 0.2 ± 0.0   | 0.99  |
| <b>Regional Recurrence Mean</b>        | 0.7 ± 0.1   | 0.8 ± 0.1   | 0.8 ± 0.1 | 0.8 ± 0.1   | 0.56  |
| <b>Regional Recurrence SD</b>          | 0.2 ± 0.0   | 0.2 ± 0.0   | 0.2 ± 0.1 | 0.2 ± 0.0   | 0.35  |
| <b>LIA occ number (cutoff 0) (N)</b>   | 17.1 ± 15.4 | 17.4 ± 14.0 | 8.6 ± 7.0 | 14.9 ± 13.3 | 0.30  |
| <b>LRA occ number (cutoff 0) (N)</b>   | 2.4 ± 2.6   | 3.2 ± 5.4   | 1.2 ± 2.1 | 2.4 ± 3.7   | 0.55  |
| <b>Focal occ number (cutoff 0) (N)</b> | 7.3 ± 3.1   | 8.1 ± 5.7   | 2.6 ± 3.5 | 6.3 ± 4.8   | 0.027 |
| <b>LIA perc time (cutoff 0) (N)</b>    | 4.6 ± 4.2   | 4.7 ± 4.1   | 2.5 ± 2.1 | 4.1 ± 3.7   | 0.37  |
| <b>LRA perc time (cutoff 0) (N)</b>    | 1.1 ± 1.4   | 1.6 ± 2.5   | 0.5 ± 0.8 | 1.1 ± 1.8   | 0.43  |
| <b>Focal perc time (cutoff 0) (N)</b>  | 0.9 ± 0.4   | 0.9 ± 0.6   | 0.3 ± 0.4 | 0.7 ± 0.6   | 0.034 |
| <b>LIA occ number (cutoff 5) (N)</b>   | 11.5 ± 12.4 | 11.7 ± 9.0  | 4.2 ± 4.8 | 9.6 ± 9.9   | 0.20  |
| <b>LRA occ number (cutoff 5) (N)</b>   | 1.8 ± 2.1   | 2.5 ± 4.8   | 0.9 ± 1.6 | 1.8 ± 3.3   | 0.56  |
| <b>Focal occ number (cutoff 5) (N)</b> | 5.3 ± 3.0   | 6.7 ± 5.8   | 1.5 ± 3.1 | 4.8 ± 4.6   | 0.043 |
| <b>LIA perc time (cutoff 5) (N)</b>    | 3.2 ± 3.5   | 3.3 ± 2.7   | 1.3 ± 1.5 | 2.7 ± 2.9   | 0.26  |
| <b>LRA perc time (cutoff 5) (N)</b>    | 0.9 ± 1.1   | 1.2 ± 2.1   | 0.3 ± 0.6 | 0.8 ± 1.5   | 0.51  |

|             |                                            |              |              |              |              |      |
|-------------|--------------------------------------------|--------------|--------------|--------------|--------------|------|
|             | <b>Focal perc time (cutoff 5) (N)</b>      | 0.6 ± 0.4    | 0.8 ± 0.7    | 0.2 ± 0.4    | 0.6 ± 0.6    | 0.06 |
|             | <b>LIA occ number (cutoff 30) (N)</b>      | 4.7 ± 9.1    | 3.0 ± 5.2    | 0.0 ± 0.0    | 2.8 ± 6.4    | 0.29 |
|             | <b>LRA occ number (cutoff 30) (N)</b>      | 0.3 ± 0.9    | 1.4 ± 4.2    | 0.0 ± 0.0    | 0.6 ± 2.6    | 0.47 |
|             | <b>Focal occ number (cutoff 30) (N)</b>    | 1.9 ± 2.5    | 3.6 ± 4.5    | 0.1 ± 0.4    | 2.1 ± 3.4    | 0.07 |
|             | <b>LIA perc time (cutoff 30) (N)</b>       | 1.3 ± 2.6    | 0.8 ± 1.4    | 0.0 ± 0.0    | 0.8 ± 1.8    | 0.29 |
|             | <b>LRA perc time (cutoff 30) (N)</b>       | 0.1 ± 0.4    | 0.6 ± 1.8    | 0.0 ± 0.0    | 0.3 ± 1.1    | 0.43 |
|             | <b>Focal perc time (cutoff 30) (N)</b>     | 0.2 ± 0.3    | 0.5 ± 0.6    | 0.0 ± 0.0    | 0.3 ± 0.4    | 0.07 |
| <b>Roof</b> | <b>Global AFCL mean (ms)</b>               | 184.4 ± 15.0 | 198.0 ± 18.0 | 201.6 ± 17.8 | 194.0 ± 18.0 | 0.07 |
|             | <b>Global AFCL SD (ms)</b>                 | 6.5 ± 1.9    | 9.6 ± 4.4    | 7.9 ± 4.2    | 8.0 ± 3.8    | 0.16 |
|             | <b>Global AFCL CovC</b>                    | 3.6 ± 1.1    | 4.8 ± 2.0    | 3.9 ± 2.1    | 4.1 ± 1.8    | 0.28 |
|             | <b>Regional AFCL mean (ms)</b>             | 180.1 ± 14.8 | 194.8 ± 20.2 | 199.0 ± 15.7 | 190.5 ± 18.5 | 0.05 |
|             | <b>Regional AFCL SD(ms)</b>                | 4.0 ± 1.9    | 4.7 ± 3.3    | 6.7 ± 4.8    | 5.0 ± 3.4    | 0.25 |
|             | <b>Regional AFCL CovC</b>                  | 2.2 ± 0.9    | 2.4 ± 1.6    | 3.3 ± 2.4    | 2.6 ± 1.7    | 0.34 |
|             | <b>Global Intra Chamber Coherence mean</b> | 0.4 ± 0.1    | 0.4 ± 0.1    | 0.4 ± 0.1    | 0.4 ± 0.1    | 0.76 |

|                                              |             |             |             |             |       |
|----------------------------------------------|-------------|-------------|-------------|-------------|-------|
| <b>Global Intra Chamber Coherence max</b>    | 0.5 ± 0.1   | 0.5 ± 0.1   | 0.5 ± 0.1   | 0.5 ± 0.1   | 0.89  |
| <b>Global Intra Chamber Coherence SD</b>     | 0.1 ± 0.0   | 0.1 ± 0.0   | 0.1 ± 0.0   | 0.1 ± 0.0   | 0.87  |
| <b>Regional Intra Chamber Coherence mean</b> | 0.4 ± 0.1   | 0.4 ± 0.2   | 0.4 ± 0.1   | 0.4 ± 0.1   | 0.69  |
| <b>Regional Intra Chamber Coherence max</b>  | 0.5 ± 0.1   | 0.5 ± 0.2   | 0.5 ± 0.1   | 0.5 ± 0.1   | 0.85  |
| <b>Regional Intra Chamber Coherence SD</b>   | 0.1 ± 0.0   | 0.0 ± 0.0   | 0.1 ± 0.0   | 0.1 ± 0.0   | 0.46  |
| <b>Global Recurrence Mean</b>                | 0.4 ± 0.1   | 0.4 ± 0.1   | 0.4 ± 0.1   | 0.4 ± 0.1   | 0.78  |
| <b>Global Recurrence SD</b>                  | 0.2 ± 0.0   | 0.2 ± 0.0   | 0.2 ± 0.0   | 0.2 ± 0.0   | 0.99  |
| <b>Regional Recurrence Mean</b>              | 0.6 ± 0.1   | 0.7 ± 0.1   | 0.6 ± 0.1   | 0.6 ± 0.1   | 0.06  |
| <b>Regional Recurrence SD</b>                | 0.2 ± 0.0   | 0.2 ± 0.1   | 0.2 ± 0.0   | 0.2 ± 0.0   | 0.65  |
| <b>LIA occ number (cutoff 0) (N)</b>         | 45.8 ± 32.8 | 38.4 ± 21.5 | 45.6 ± 22.4 | 43.0 ± 25.8 | 0.76  |
| <b>LRA occ number (cutoff 0) (N)</b>         | 11.0 ± 8.4  | 7.5 ± 8.7   | 5.5 ± 4.3   | 8.3 ± 7.8   | 0.03  |
| <b>Focal occ number (cutoff 0) (N)</b>       | 17.7 ± 15.6 | 10.9 ± 7.1  | 17.2 ± 10.5 | 15.1 ± 11.8 | 0.34  |
| <b>LIA perc time (cutoff 0) (N)</b>          | 13.2 ± 9.7  | 11.2 ± 6.9  | 13.0 ± 6.7  | 12.4 ± 7.8  | 0.81  |
| <b>LRA perc time (cutoff 0) (N)</b>          | 6.0 ± 4.6   | 4.7 ± 6.6   | 3.0 ± 2.5   | 4.7 ± 5.0   | 0.045 |

|                  |                                         |              |              |              |              |      |
|------------------|-----------------------------------------|--------------|--------------|--------------|--------------|------|
|                  | <b>Focal perc time (cutoff 0) (N)</b>   | 2.2 ± 1.9    | 1.3 ± 0.9    | 2.1 ± 1.3    | 1.9 ± 1.5    | 0.34 |
|                  | <b>LIA occ number (cutoff 5) (N)</b>    | 43.8 ± 34.2  | 34.2 ± 20.4  | 43.9 ± 21.9  | 40.3 ± 26.1  | 0.64 |
|                  | <b>LRA occ number (cutoff 5) (N)</b>    | 10.1 ± 8.3   | 6.7 ± 8.0    | 4.1 ± 3.8    | 7.3 ± 7.4    | 0.05 |
|                  | <b>Focal occ number (cutoff 5) (N)</b>  | 17.3 ± 16.0  | 9.4 ± 7.0    | 15.0 ± 11.6  | 13.8 ± 12.2  | 0.31 |
|                  | <b>LIA perc time (cutoff 5) (N)</b>     | 12.7 ± 10.1  | 10.3 ± 6.9   | 12.6 ± 6.6   | 11.8 ± 8.0   | 0.74 |
|                  | <b>LRA perc time (cutoff 5) (N)</b>     | 5.5 ± 4.5    | 4.3 ± 6.3    | 2.5 ± 2.3    | 4.2 ± 4.8    | 0.07 |
|                  | <b>Focal perc time (cutoff 5) (N)</b>   | 2.1 ± 2.0    | 1.2 ± 0.8    | 1.9 ± 1.4    | 1.7 ± 1.5    | 0.30 |
|                  | <b>LIA occ number (cutoff 30) (N)</b>   | 28.5 ± 27.7  | 22.5 ± 22.1  | 28.2 ± 18.3  | 26.2 ± 22.8  | 0.80 |
|                  | <b>LRA occ number (cutoff 30) (N)</b>   | 6.5 ± 6.6    | 4.0 ± 7.8    | 2.9 ± 4.2    | 4.6 ± 6.5    | 0.46 |
|                  | <b>Focal occ number (cutoff 30) (N)</b> | 14.2 ± 15.2  | 6.2 ± 6.5    | 11.8 ± 9.6   | 10.6 ± 11.4  | 0.25 |
|                  | <b>LIA perc time (cutoff 30) (N)</b>    | 8.7 ± 8.7    | 6.9 ± 7.5    | 8.7 ± 5.9    | 8.1 ± 7.4    | 0.83 |
|                  | <b>LRA perc time (cutoff 30) (N)</b>    | 3.6 ± 3.7    | 2.8 ± 6.4    | 1.7 ± 2.5    | 2.8 ± 4.6    | 0.69 |
|                  | <b>Focal perc time (cutoff 30) (N)</b>  | 1.8 ± 1.9    | 0.8 ± 0.8    | 1.5 ± 1.2    | 1.3 ± 1.4    | 0.23 |
| <b>Posterior</b> | <b>Global AFCL mean (ms)</b>            | 184.4 ± 15.0 | 198.0 ± 18.0 | 201.6 ± 17.8 | 194.0 ± 18.0 | 0.07 |

|                                              |              |              |              |              |      |
|----------------------------------------------|--------------|--------------|--------------|--------------|------|
| <b>Global AFCL SD (ms)</b>                   | 6.5 ± 1.9    | 9.6 ± 4.4    | 7.9 ± 4.2    | 8.0 ± 3.8    | 0.16 |
| <b>Global AFCL CovC</b>                      | 3.6 ± 1.1    | 4.8 ± 2.0    | 3.9 ± 2.1    | 4.1 ± 1.8    | 0.28 |
| <b>Regional AFCL mean (ms)</b>               | 182.1 ± 14.5 | 196.8 ± 18.2 | 200.0 ± 15.3 | 192.3 ± 17.5 | 0.04 |
| <b>Regional AFCL SD (ms)</b>                 | 5.3 ± 2.5    | 7.6 ± 4.1    | 6.1 ± 2.9    | 6.4 ± 3.3    | 0.25 |
| <b>Regional AFCL CovC</b>                    | 2.9 ± 1.5    | 3.8 ± 1.9    | 3.1 ± 1.6    | 3.3 ± 1.7    | 0.45 |
| <b>Global Intra Chamber Coherence mean</b>   | 0.4 ± 0.1    | 0.4 ± 0.1    | 0.4 ± 0.1    | 0.4 ± 0.1    | 0.76 |
| <b>Global Intra Chamber Coherence max</b>    | 0.5 ± 0.1    | 0.5 ± 0.1    | 0.5 ± 0.1    | 0.5 ± 0.1    | 0.89 |
| <b>Global Intra Chamber Coherence SD</b>     | 0.1 ± 0.0    | 0.1 ± 0.0    | 0.1 ± 0.0    | 0.1 ± 0.0    | 0.87 |
| <b>Regional Intra Chamber Coherence mean</b> | 0.4 ± 0.1    | 0.4 ± 0.2    | 0.4 ± 0.2    | 0.4 ± 0.1    | 0.92 |
| <b>Regional Intra Chamber Coherence max</b>  | 0.5 ± 0.1    | 0.5 ± 0.1    | 0.5 ± 0.1    | 0.5 ± 0.1    | 0.92 |
| <b>Regional Intra Chamber Coherence SD</b>   | 0.1 ± 0.0    | 0.1 ± 0.0    | 0.1 ± 0.0    | 0.1 ± 0.0    | 0.83 |
| <b>Global Recurrence Mean</b>                | 0.4 ± 0.1    | 0.4 ± 0.1    | 0.4 ± 0.1    | 0.4 ± 0.1    | 0.78 |
| <b>Global Recurrence SD</b>                  | 0.2 ± 0.0    | 0.2 ± 0.0    | 0.2 ± 0.0    | 0.2 ± 0.0    | 0.99 |
| <b>Regional Recurrence Mean</b>              | 0.5 ± 0.1    | 0.6 ± 0.1    | 0.5 ± 0.1    | 0.5 ± 0.1    | 0.92 |

|                                        |             |             |             |             |       |
|----------------------------------------|-------------|-------------|-------------|-------------|-------|
| <b>Regional Recurrence SD</b>          | 0.2 ± 0.0   | 0.2 ± 0.0   | 0.2 ± 0.0   | 0.2 ± 0.0   | 0.69  |
| <b>LIA occ number (cutoff 0) (N)</b>   | 74.7 ± 33.2 | 65.2 ± 40.3 | 59.6 ± 32.2 | 67.2 ± 35.1 | 0.65  |
| <b>LRA occ number (cutoff 0) (N)</b>   | 16.9 ± 9.8  | 12.6 ± 14.5 | 10.1 ± 7.9  | 13.5 ± 11.4 | 0.042 |
| <b>Focal occ number (cutoff 0) (N)</b> | 23.3 ± 8.7  | 26.1 ± 11.8 | 26.6 ± 15.2 | 25.2 ± 11.5 | 0.79  |
| <b>LIA perc time (cutoff 0) (N)</b>    | 21.7 ± 10.8 | 18.2 ± 12.0 | 16.8 ± 9.3  | 19.1 ± 10.7 | 0.59  |
| <b>LRA perc time (cutoff 0) (N)</b>    | 8.7 ± 5.5   | 6.4 ± 6.7   | 5.7 ± 5.1   | 7.1 ± 5.8   | 0.048 |
| <b>Focal perc time (cutoff 0) (N)</b>  | 2.9 ± 1.1   | 3.2 ± 1.4   | 3.3 ± 1.8   | 3.1 ± 1.4   | 0.79  |
| <b>LIA occ number (cutoff 5) (N)</b>   | 71.5 ± 34.1 | 60.4 ± 38.6 | 55.6 ± 33.0 | 63.2 ± 35.0 | 0.60  |
| <b>LRA occ number (cutoff 5) (N)</b>   | 15.2 ± 8.7  | 11.4 ± 13.5 | 9.4 ± 7.9   | 12.2 ± 10.5 | 0.08  |
| <b>Focal occ number (cutoff 5) (N)</b> | 21.6 ± 9.1  | 23.5 ± 12.9 | 25.1 ± 16.0 | 23.3 ± 12.2 | 0.83  |
| <b>LIA perc time (cutoff 5) (N)</b>    | 20.9 ± 11.0 | 17.1 ± 11.8 | 15.8 ± 9.5  | 18.2 ± 10.8 | 0.57  |
| <b>LRA perc time (cutoff 5) (N)</b>    | 8.2 ± 5.2   | 5.9 ± 6.3   | 5.3 ± 5.0   | 6.5 ± 5.6   | 0.09  |
| <b>Focal perc time (cutoff 5) (N)</b>  | 2.7 ± 1.1   | 2.9 ± 1.5   | 3.1 ± 2.0   | 2.9 ± 1.5   | 0.84  |
| <b>LIA occ number (cutoff 30) (N)</b>  | 54.5 ± 28.5 | 40.2 ± 30.0 | 38.4 ± 31.4 | 45.0 ± 29.7 | 0.42  |

|                 |                                            |              |              |              |              |      |
|-----------------|--------------------------------------------|--------------|--------------|--------------|--------------|------|
|                 | <b>LRA occ number (cutoff 30) (N)</b>      | 10.5 ± 6.8   | 7.8 ± 8.9    | 6.0 ± 7.3    | 8.3 ± 7.7    | 0.16 |
|                 | <b>Focal occ number (cutoff 30) (N)</b>    | 15.6 ± 10.2  | 16.3 ± 12.7  | 21.0 ± 14.0  | 17.3 ± 12.0  | 0.61 |
|                 | <b>LIA perc time (cutoff 30) (N)</b>       | 16.6 ± 9.5   | 12.1 ± 9.9   | 11.4 ± 9.1   | 13.6 ± 9.5   | 0.42 |
|                 | <b>LRA perc time (cutoff 30) (N)</b>       | 5.7 ± 4.1    | 4.5 ± 4.8    | 3.6 ± 4.7    | 4.7 ± 4.5    | 0.11 |
|                 | <b>Focal perc time (cutoff 30) (N)</b>     | 1.9 ± 1.3    | 2.0 ± 1.5    | 2.6 ± 1.7    | 2.1 ± 1.5    | 0.59 |
| <b>Inferior</b> | <b>Global AFCL mean (ms)</b>               | 184.4 ± 15.0 | 198.0 ± 18.0 | 201.6 ± 17.8 | 194.0 ± 18.0 | 0.07 |
|                 | <b>Global AFCL SD (ms)</b>                 | 6.5 ± 1.9    | 9.6 ± 4.4    | 7.9 ± 4.2    | 8.0 ± 3.8    | 0.16 |
|                 | <b>Global AFCL CovC</b>                    | 3.6 ± 1.1    | 4.8 ± 2.0    | 3.9 ± 2.1    | 4.1 ± 1.8    | 0.28 |
|                 | <b>Regional AFCL mean (ms)</b>             | 186.4 ± 14.6 | 198.0 ± 17.2 | 202.0 ± 18.8 | 194.8 ± 17.5 | 0.12 |
|                 | <b>Regional AFCL SD (ms)</b>               | 5.4 ± 2.3    | 5.8 ± 2.3    | 5.9 ± 3.9    | 5.7 ± 2.7    | 0.93 |
|                 | <b>Regional AFCL CovC</b>                  | 3.0 ± 1.4    | 2.9 ± 1.0    | 2.9 ± 1.7    | 2.9 ± 1.3    | 0.98 |
|                 | <b>Global Intra Chamber Coherence mean</b> | 0.4 ± 0.1    | 0.4 ± 0.1    | 0.4 ± 0.1    | 0.4 ± 0.1    | 0.76 |
|                 | <b>Global Intra Chamber Coherence max</b>  | 0.5 ± 0.1    | 0.5 ± 0.1    | 0.5 ± 0.1    | 0.5 ± 0.1    | 0.89 |
|                 | <b>Global Intra Chamber Coherence SD</b>   | 0.1 ± 0.0    | 0.1 ± 0.0    | 0.1 ± 0.0    | 0.1 ± 0.0    | 0.87 |

|                                              |             |             |            |             |       |
|----------------------------------------------|-------------|-------------|------------|-------------|-------|
| <b>Regional Intra Chamber Coherence mean</b> | 0.4 ± 0.1   | 0.4 ± 0.1   | 0.4 ± 0.1  | 0.4 ± 0.1   | 0.72  |
| <b>Regional Intra Chamber Coherence max</b>  | 0.5 ± 0.1   | 0.5 ± 0.2   | 0.5 ± 0.1  | 0.5 ± 0.1   | 0.84  |
| <b>Regional Intra Chamber Coherence SD</b>   | 0.0 ± 0.0   | 0.0 ± 0.0   | 0.0 ± 0.0  | 0.0 ± 0.0   | 0.76  |
| <b>Global Recurrence Mean</b>                | 0.4 ± 0.1   | 0.4 ± 0.1   | 0.4 ± 0.1  | 0.4 ± 0.1   | 0.78  |
| <b>Global Recurrence SD</b>                  | 0.2 ± 0.0   | 0.2 ± 0.0   | 0.2 ± 0.0  | 0.2 ± 0.0   | 0.99  |
| <b>Regional Recurrence Mean</b>              | 0.7 ± 0.1   | 0.7 ± 0.1   | 0.7 ± 0.1  | 0.7 ± 0.1   | 0.19  |
| <b>Regional Recurrence SD</b>                | 0.2 ± 0.0   | 0.2 ± 0.0   | 0.2 ± 0.0  | 0.2 ± 0.0   | 0.62  |
| <b>LIA occ number (cutoff 0) (N)</b>         | 32.7 ± 22.1 | 24.7 ± 14.1 | 16.2 ± 8.1 | 25.4 ± 17.2 | 0.011 |
| <b>LRA occ number (cutoff 0) (N)</b>         | 5.9 ± 4.5   | 5.1 ± 5.5   | 5.0 ± 5.0  | 5.4 ± 4.9   | 0.90  |
| <b>Focal occ number (cutoff 0) (N)</b>       | 10.9 ± 8.2  | 11.5 ± 6.5  | 10.8 ± 6.9 | 11.1 ± 7.0  | 0.97  |
| <b>LIA perc time (cutoff 0) (N)</b>          | 9.1 ± 6.5   | 6.7 ± 3.9   | 4.3 ± 2.0  | 7.0 ± 5.0   | 0.013 |
| <b>LRA perc time (cutoff 0) (N)</b>          | 3.2 ± 2.7   | 2.9 ± 3.2   | 2.9 ± 2.8  | 3.0 ± 2.8   | 0.95  |
| <b>Focal perc time (cutoff 0) (N)</b>        | 1.3 ± 1.0   | 1.4 ± 0.8   | 1.4 ± 0.9  | 1.4 ± 0.9   | 0.96  |
| <b>LIA occ number (cutoff 5) (N)</b>         | 26.4 ± 22.5 | 17.5 ± 10.8 | 10.8 ± 6.0 | 19.0 ± 16.2 | 0.019 |



|                                         |             |            |           |            |      |
|-----------------------------------------|-------------|------------|-----------|------------|------|
| <b>LRA occ number (cutoff 5) (N)</b>    | 5.3 ± 4.6   | 4.5 ± 5.6  | 4.6 ± 4.4 | 4.8 ± 4.8  | 0.93 |
| <b>Focal occ number (cutoff 5) (N)</b>  | 9.0 ± 8.2   | 10.5 ± 6.1 | 9.6 ± 7.1 | 9.7 ± 7.0  | 0.89 |
| <b>LIA perc time (cutoff 5) (N)</b>     | 7.6 ± 6.7   | 4.8 ± 2.9  | 2.9 ± 1.7 | 5.3 ± 4.8  | 0.09 |
| <b>LRA perc time (cutoff 5) (N)</b>     | 2.9 ± 2.8   | 2.6 ± 3.2  | 2.7 ± 2.6 | 2.7 ± 2.8  | 0.98 |
| <b>Focal perc time (cutoff 5) (N)</b>   | 1.1 ± 1.0   | 1.3 ± 0.8  | 1.2 ± 0.9 | 1.2 ± 0.9  | 0.89 |
| <b>LIA occ number (cutoff 30) (N)</b>   | 14.6 ± 18.8 | 6.5 ± 6.4  | 2.2 ± 2.9 | 8.3 ± 12.8 | 0.09 |
| <b>LRA occ number (cutoff 30) (N)</b>   | 2.4 ± 2.8   | 3.0 ± 4.5  | 2.9 ± 4.1 | 2.7 ± 3.7  | 0.92 |
| <b>Focal occ number (cutoff 30) (N)</b> | 3.5 ± 3.9   | 6.6 ± 5.5  | 6.1 ± 4.9 | 5.3 ± 4.8  | 0.27 |
| <b>LIA perc time (cutoff 30) (N)</b>    | 4.4 ± 5.8   | 1.8 ± 1.8  | 0.6 ± 0.8 | 2.4 ± 3.9  | 0.08 |
| <b>LRA perc time (cutoff 30) (N)</b>    | 1.4 ± 1.8   | 1.7 ± 2.6  | 1.7 ± 2.2 | 1.6 ± 2.2  | 0.93 |
| <b>Focal perc time (cutoff 30) (N)</b>  | 0.4 ± 0.5   | 0.8 ± 0.7  | 0.8 ± 0.6 | 0.7 ± 0.6  | 0.27 |

AFCL: atrial fibrillation cycle length; FCA: focal centrifugal activation; LIA: localized irregular activation; LRA: localized rotational activation; PVI: pulmonary vein isolation; SD: standard deviation.

## SUPPLEMENTARY FIGURES

Supplementary Figure S1. Left atrium regional segmentation

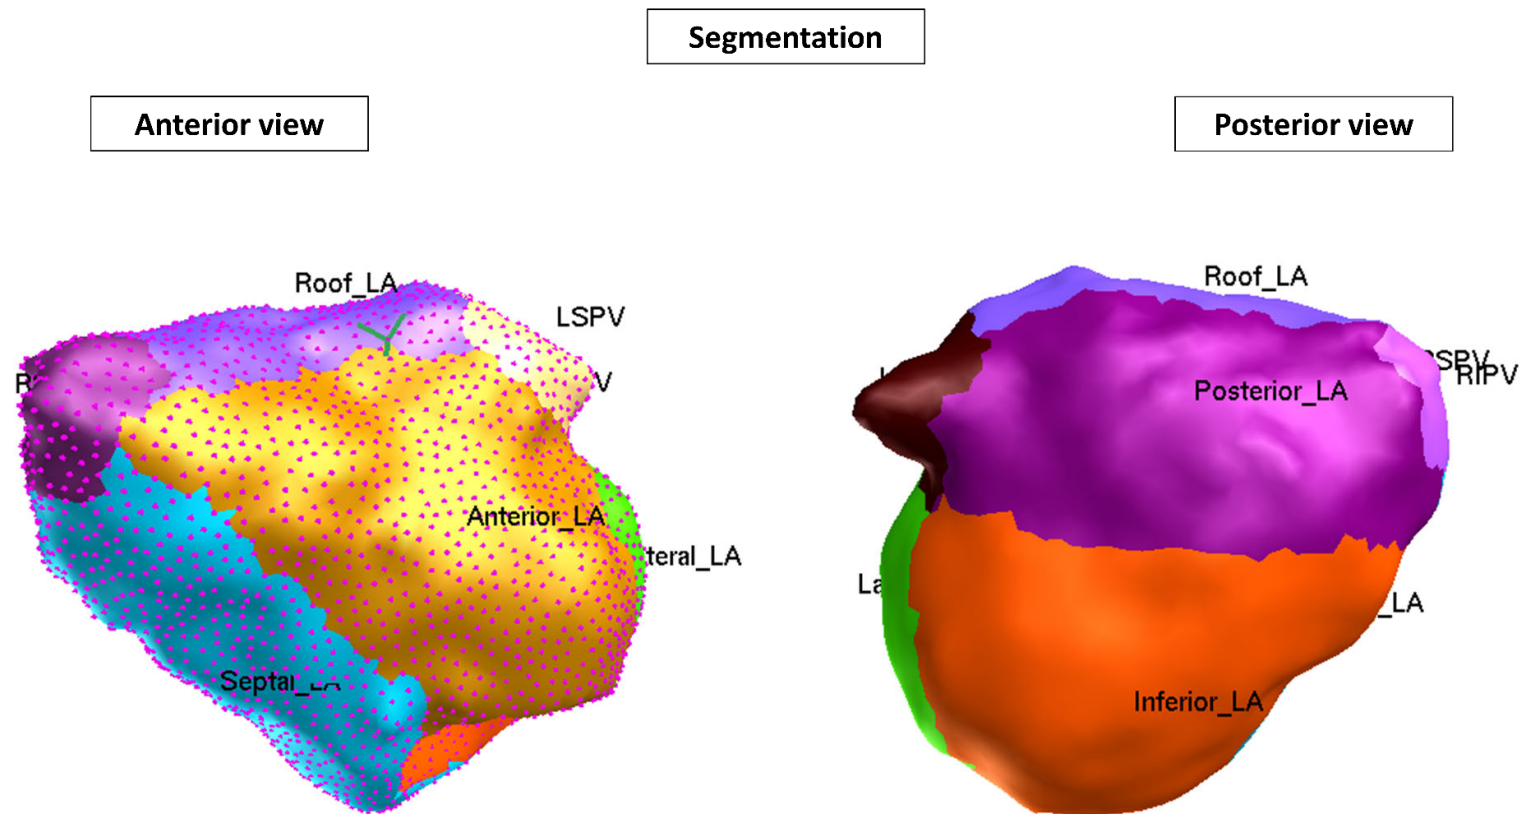

Left atrium regional segmentation. On the left anterior-posterior view, on the right posterior-anterior view. For the current study, LA maps were divided into the following 6 regions: anterior, septal, lateral, roof, posterior, inferior. The analysis was performed accordingly, for global LA map and for each regional AF segment.
